# Supplementary material for: NGSEA: Network-Based Gene Set Enrichment Analysis for Interpreting Gene Expression Phenotypes with Functional Gene Sets
Source: PubMed Central journal article supplement — Mol Cells. 2019 Jul 16;42(8):579–88. doi: 10.14348/molcells.2019.0065 (PMC6715341; doi:10.14348/molcells.2019.0065), 2019-07-16
Supplement: molce-42-579_supple.pdf [file molce-42-579_supple.pdf]

**Supplementary Table S1A.** Gold standard expression data sets from KEGGdzPathwaysGEO

| GEO ID   | Pubmed ID | Disease/Target pathway     | KEGG ID  | Tissue                       |
|----------|-----------|----------------------------|----------|------------------------------|
| GSE9476  | 17910043  | Acute myeloid leukemia     | hsa05221 | Blood, Bone marrow           |
| GSE1297  | 14769913  | Alzheimer's Disease        | hsa05010 | Hippocampal CA1              |
| GSE5281  | 17077275  | Alzheimer's Disease        | hsa05010 | Brain, Entorhinal Cortex     |
| GSE5281  | 17077275  | Alzheimer's Disease        | hsa05010 | Brain, hippocampus           |
| GSE5281  | 17077275  | Alzheimer's Disease        | hsa05010 | Brain, Primary visual cortex |
| GSE4107  | 17317818  | Colorectal Cancer          | hsa05210 | Mucosa                       |
| GSE8671  | 18171984  | Colorectal Cancer          | hsa05210 | Colon                        |
| GSE9348  | 20143136  | Colorectal Cancer          | hsa05210 | Colon                        |
| GSE3585  | 17045896  | Dilated cardiomyopathy     | hsa05414 | Heart                        |
| GSE19728 | -         | Glioma                     | hsa05214 | Brain                        |
| GSE21354 | -         | Glioma                     | hsa05214 | Brain, Spine                 |
| GSE8762  | 17724341  | Huntington's Disease       | hsa05016 | Lymphocytes (blood)          |
| GSE18842 | 20878980  | Non-Small Cell Lung Cancer | hsa05223 | Lung                         |
| GSE19188 | 20421987  | Non-Small Cell Lung Cancer | hsa05223 | Lung                         |
| GSE15471 | 19260470  | Pancreatic Cancer          | hsa05212 | Pancreas                     |
| GSE16515 | 19732725  | Pancreatic Cancer          | hsa05212 | Pancreas                     |
| GSE20153 | 20926834  | Parkinson's Disease        | hsa05012 | Lymphoblasts                 |
| GSE20291 | 15965975  | Parkinson's Disease        | hsa05012 | Postmortem brain putamen     |
| GSE6956  | 18245496  | Prostate Cancer            | hsa05215 | Prostate, African-American   |
| GSE6956  | 18245496  | Prostate Cancer            | hsa05215 | Prostate, Caucasian          |
| GSE14762 | 19252501  | Renal Cancer               | hsa05211 | Kidney                       |
| GSE781   | 14641932  | Renal Cancer               | hsa05211 | Kidney                       |
| GSE3467  | 16365291  | Thyroid Cancer             | hsa05216 | Thyroid                      |
| GSE3678  | -         | Thyroid Cancer             | hsa05216 | Thyroid                      |

**Supplementary Table S1B.** Gold standard expression data sets from Expression Atlas and DisGeNet

| <b>Expression Atlas ID</b> | <b>Pubmed ID</b> | <b>Disease/Target pathway</b> | <b>Disease ID</b> |
|----------------------------|------------------|-------------------------------|-------------------|
| E-GEOD-53239               | 24393808         | Bipolar disorder              | C0005586          |
| E-GEOD-60052               | 27093186         | Small cell lung cancer        | C0149925          |
| E-GEOD-66573               | -                | Multiple sclerosis            | C0026769          |
| E-GEOD-72509               | 26382853         | Lupus erythematosus           | C0024141          |
| E-GEOD-93624               | 28805827         | Crohn's disease               | C0010346          |

**Supplementary Table S2. Cell viability after treatment of budesonide**

| <b>HCT116</b> | control | 50       | 100      | 150      | 200      | 250      |
|---------------|---------|----------|----------|----------|----------|----------|
| 24hrs         | 100     | 103.4414 | 92.07371 | 78.19716 | 49.24512 | 34.8579  |
| 48hrs         | 100     | 100.2643 | 68.14329 | 51.83666 | 39.62264 | 33.95315 |
| 72hrs         | 100     | 101.7935 | 62.23228 | 51.43073 | 25.23072 | 25.09142 |

| <b>HT-29</b> | control | 50       | 100      | 150      | 200      | 250      |
|--------------|---------|----------|----------|----------|----------|----------|
| 24hrs        | 100     | 102.1072 | 86.37321 | 82.69726 | 49.98829 | 48.81761 |
| 48hrs        | 100     | 100.1124 | 75.16505 | 49.69799 | 45.55415 | 46.48125 |
| 72hrs        | 100     | 96.85039 | 76.34372 | 35.73434 | 37.43923 | 37.19274 |

\* Antiproliferative effect of budesonide on HCT116 and HT-29 cell line  
(viability of drug treated cell lines at 24, 48 & 72 hrs by MTS assay)

\* Each value is the percentage of normalized viability compared to DMSO treated cells.

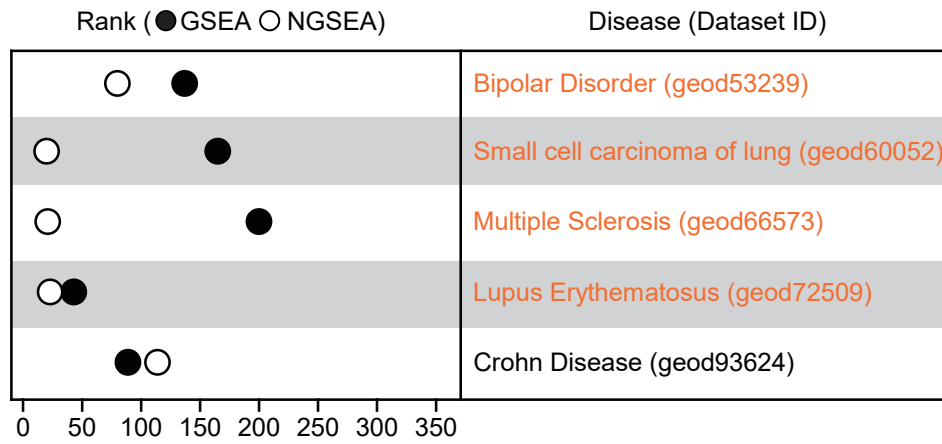

**Supplementary Fig. S1.** Rank comparison of the matched DisGeNet disease gene sets between GSEA and NGSEA for each of the 5 gold-standard expression data sets compiled from Expression Atlas.

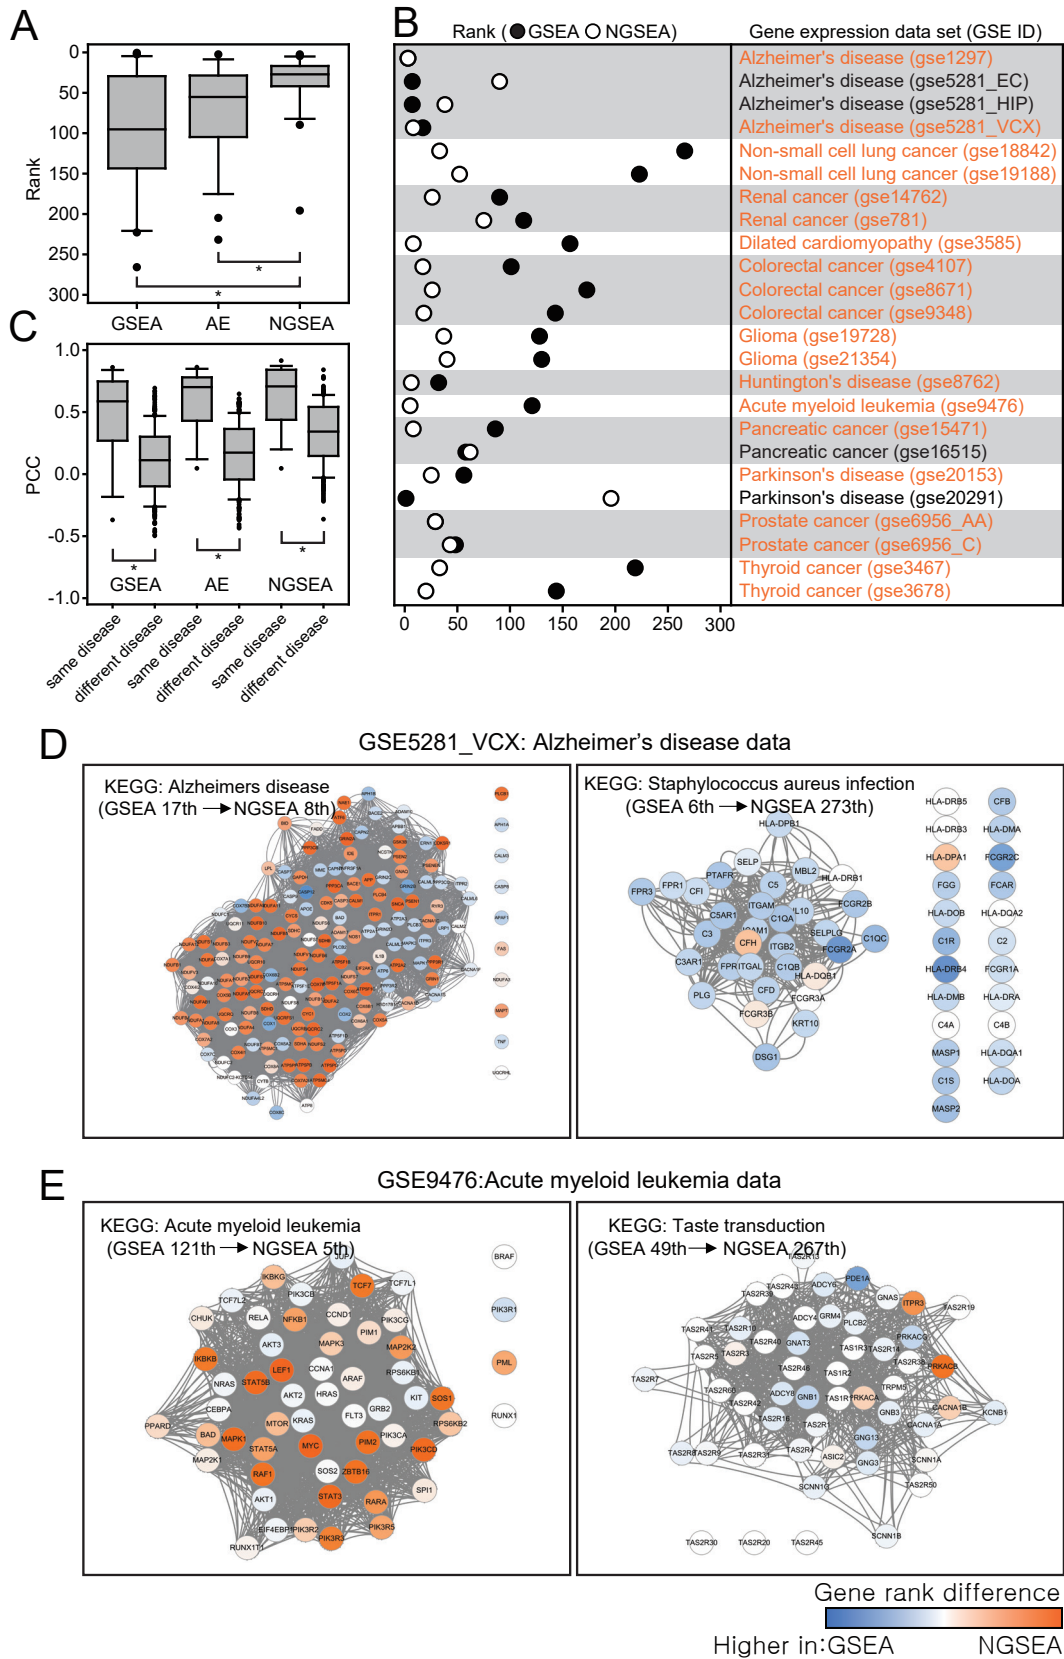

**Supplementary Fig. S2.** Recovery of KEGG pathways for matched disease expression datasets by GSEA, AE, and NGSEA with STRING network.
